# Supplementary material for: An exploration of patient-provider dynamics and childbirth experiences in rural and urban Peru: a qualitative study
Source: Springer Nature journal article supplement (doi:10.1186/s12884-021-03586-y), 2021-02-15
Supplement: MOESM1 [file 18863098]

ID #: \_\_\_\_\_

Fecha: \_\_\_\_\_

Entrevistador: \_\_\_\_\_

**Questionnaire (22 questions)**

(Please write a response on the line or select an option)

1. What is your age? \_\_\_\_\_
2. What do you work on?  
\_\_\_\_\_
3. One-month household income:  
\_\_\_\_\_
4. What is date of your most recent birth?  
\_\_\_\_\_
5. What religion do you identify with?  
\_\_\_\_\_
6. What district/city do you live in?  
\_\_\_\_\_
7. Where were you born?  
\_\_\_\_\_
8. What is your highest level of studies?  
No school  
Primary school  
Middle school (grades 7-9)  
High school  
University
9. What is your marital status?  
Single  
Hunted  
Divorced  
Separate  
Widow

10. Distance to the clinic closest to your home?  
<30 minutes walking  
>30 minutes walking
11. Was your most recent pregnancy planned?  
Yes  
No
12. How many children do you have?  
1  
2  
3  
4+
13. How many times have you been pregnant?  
1  
2  
3  
4+
14. How many childbirths have you had?  
1  
2  
3  
4+
15. How many of your children died during childbirth?  
0  
1  
2  
3  
4+
16. How many of your children died within the first 28 days of life?  
0  
1  
2  
3  
4+

ID #: \_\_\_\_\_

Fecha: \_\_\_\_\_

Entrevistador: \_\_\_\_\_

17. How many times did you experience a complication during childbirth?

- 0
- 1
- 2
- 3
- 4+

18. If at least one complication arose, what was the complication(s)?

---

---

---

19. How many times have you given birth in a facility? Elaborate: \_\_\_\_\_

- 0
- 1
- 2
- 3
- 4+

20. How many times have you given birth at home?

- 0
- 1
- 2
- 3
- 4+

21. How many times (at home) have you given birth with the help of a midwife, doctor, or nurse?

- 0
- 1
- 2
- 3
- 4+

22. How many times (in clinic) have you given birth with the help of midwife, doctor, or nurse?

- 0
- 1
- 2
- 3
- 4+
